# Supplementary material for: Efficient microencapsulation of a liquid isocyanate with in situ shell functionalization
Source: Royal Society of Chemistry journal article supplement (doi:10.1039/c4py01448k), 2014-11-11
Supplement: c4py01448k1.pdf [file c4py01448k1.pdf]

# Efficient microencapsulation of a liquid isocyanate with *in situ* shell functionalization

Le-Thu T. Nguyen,<sup>†,‡</sup> Xander K. D. Hillewaere,<sup>†</sup> Roberto F. A. Teixeira,<sup>†</sup> Otto van den Berg,<sup>†</sup>  
Filip E. Du Prez\*,<sup>†</sup>

<sup>†</sup> Department of Organic and Macromolecular Chemistry, Polymer Chemistry Research group, Ghent University, Krijgslaan 281 S4, 9000 Gent, and SIM vzw, technologiepark 935, 9052 Zwijnaarde, Belgium

<sup>‡</sup> Department of Polymer Materials, Faculty of Materials Technology, Ho Chi Minh City University of Technology–Vietnam National University, Ly Thuong Kiet 268, District 10, Ho Chi Minh City, Vietnam

## SUPPORTING INFORMATION

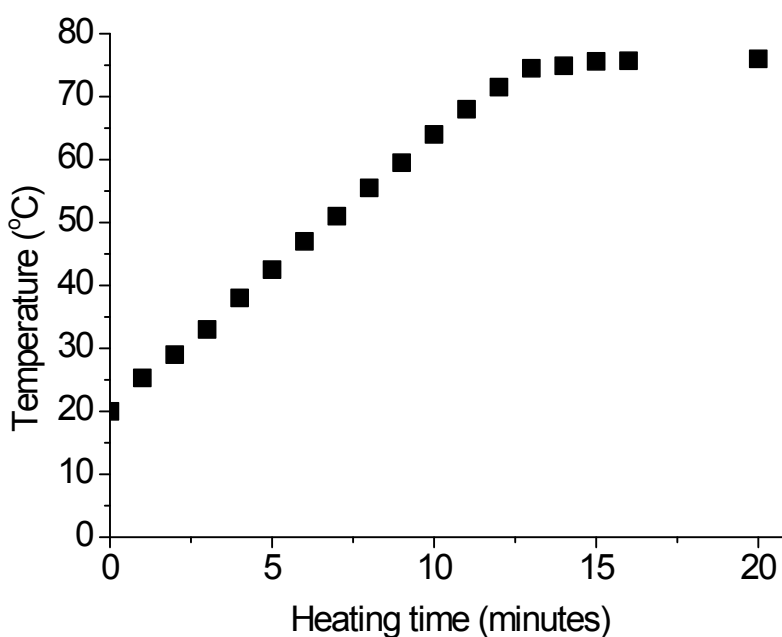

Figure S1. Temperature profile applied in the synthesis of microcapsules.

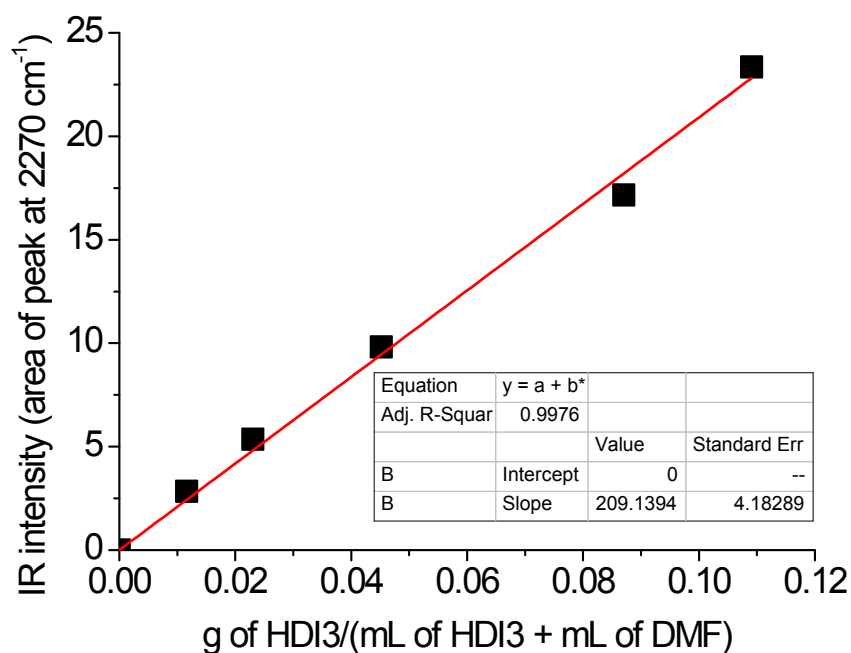

Figure S2. Intensity-concentration Lambert-Beer's law calibration plot of HDI-trimer measured in DMF after solvent signal subtraction.

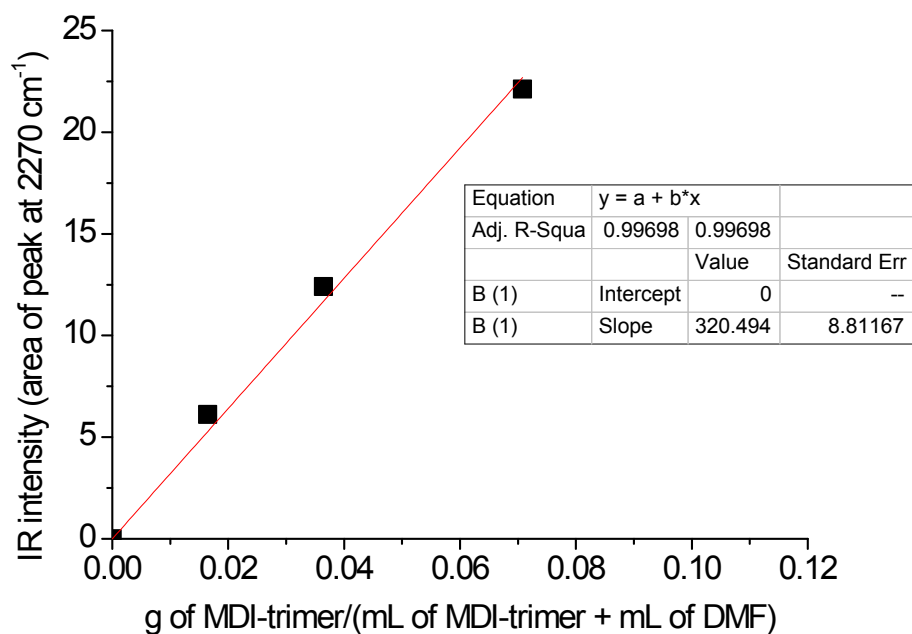

Figure S3. Intensity-concentration Lambert-Beer's law calibration plot of MDI-trimer measured in DMF after solvent signal subtraction.

Table S1. Optimal heating time, determined by the shortest reaction time to give well-dispersed stable microcapsules

| Entry | Functionalizing compound                    | Optimal heating time (min) | Optimal isocyanate core content (%) | Isocyanate core content upon extension of the reaction time for another 5 min (%) | Isocyanate core content after exposure of microcapsules to air at room temperature for one month (%) |
|-------|---------------------------------------------|----------------------------|-------------------------------------|-----------------------------------------------------------------------------------|------------------------------------------------------------------------------------------------------|
| 1     | non-functionalized                          | 20                         | 49                                  | 30                                                                                | 15                                                                                                   |
| 2     | 2-ethylhexylamine                           | 20                         | 67                                  | 51                                                                                | 62                                                                                                   |
| 3     | 3,4-difluorobenzylamine                     | 15                         | 73                                  | 62                                                                                | 68                                                                                                   |
| 4     | perfluorodecylamine + 2-ethylhexylamine     | 15                         | 76                                  | 69                                                                                | 67                                                                                                   |
| 5     | 3,4-difluorobenzylamine + 2-ethylhexylamine | 15                         | 70                                  | 59                                                                                | 57                                                                                                   |
| 6     | HMDS                                        | 10                         | 83                                  | 62                                                                                | 66                                                                                                   |

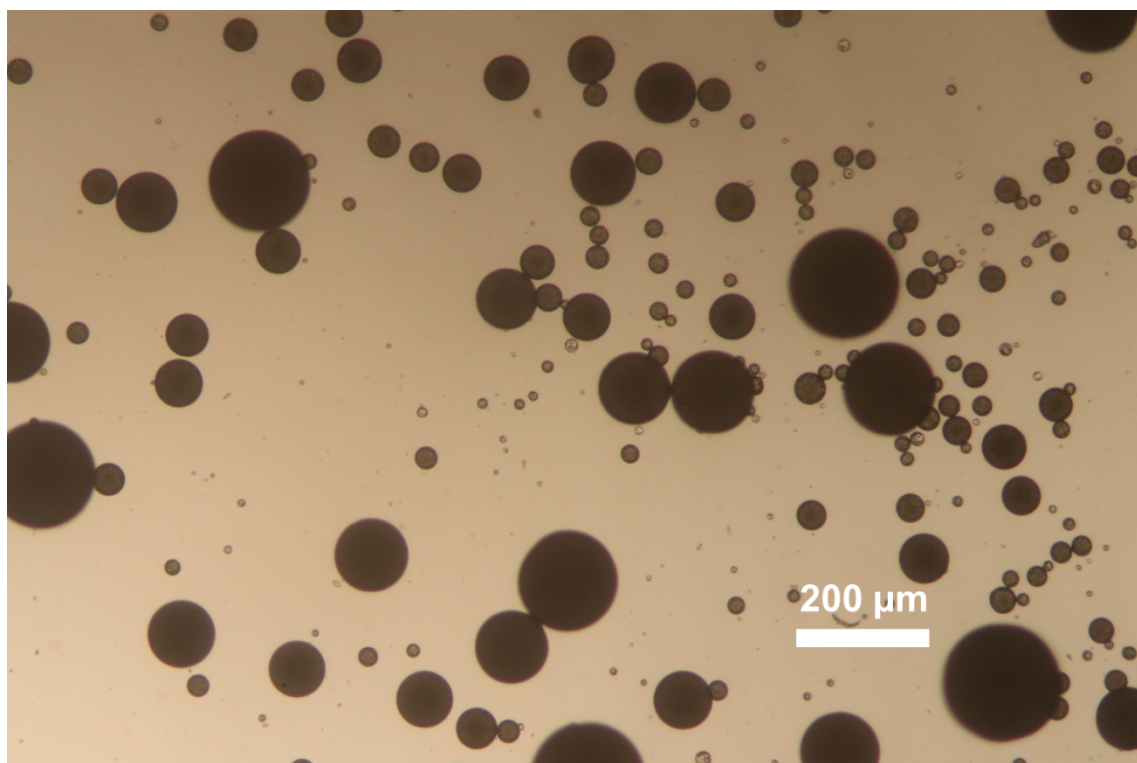

Figure S4. Optical microscopic image of HDI-trimer containing polyurea microcapsules without shell functionalization in the wet state.

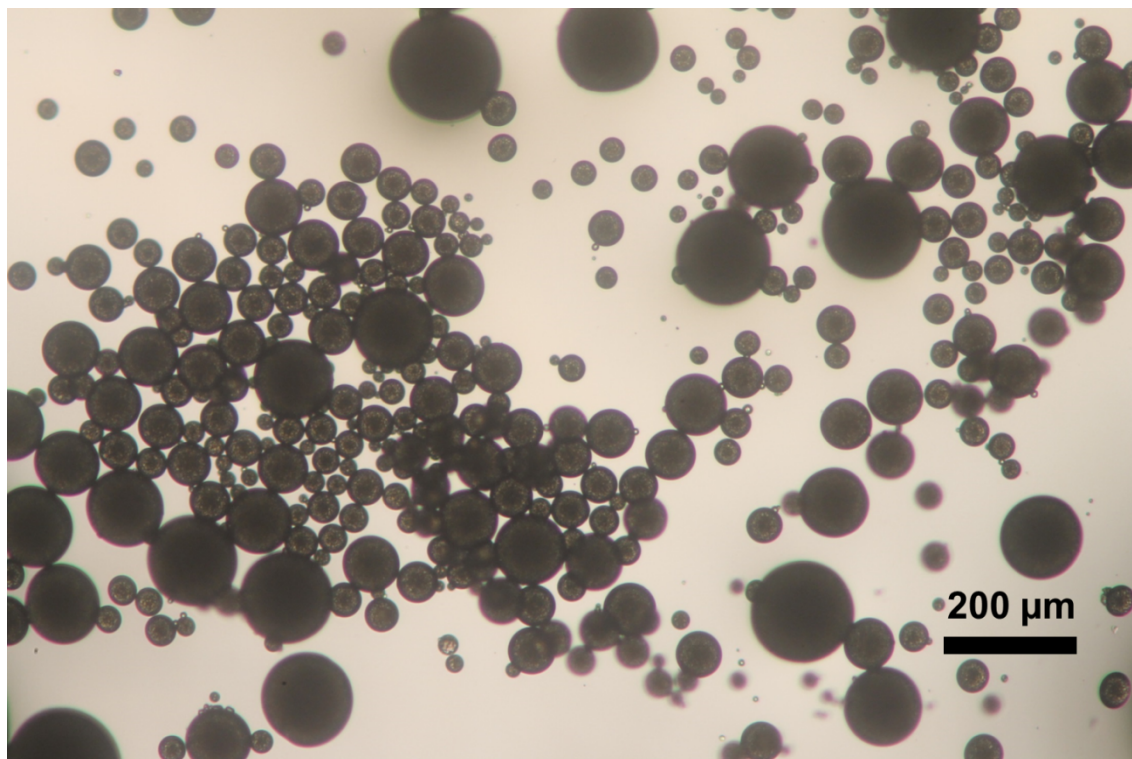

Figure S5. Optical microscopic image of of HDI-trimer containing polyurea microcapsules with shell modification using HMDS in the wet state.

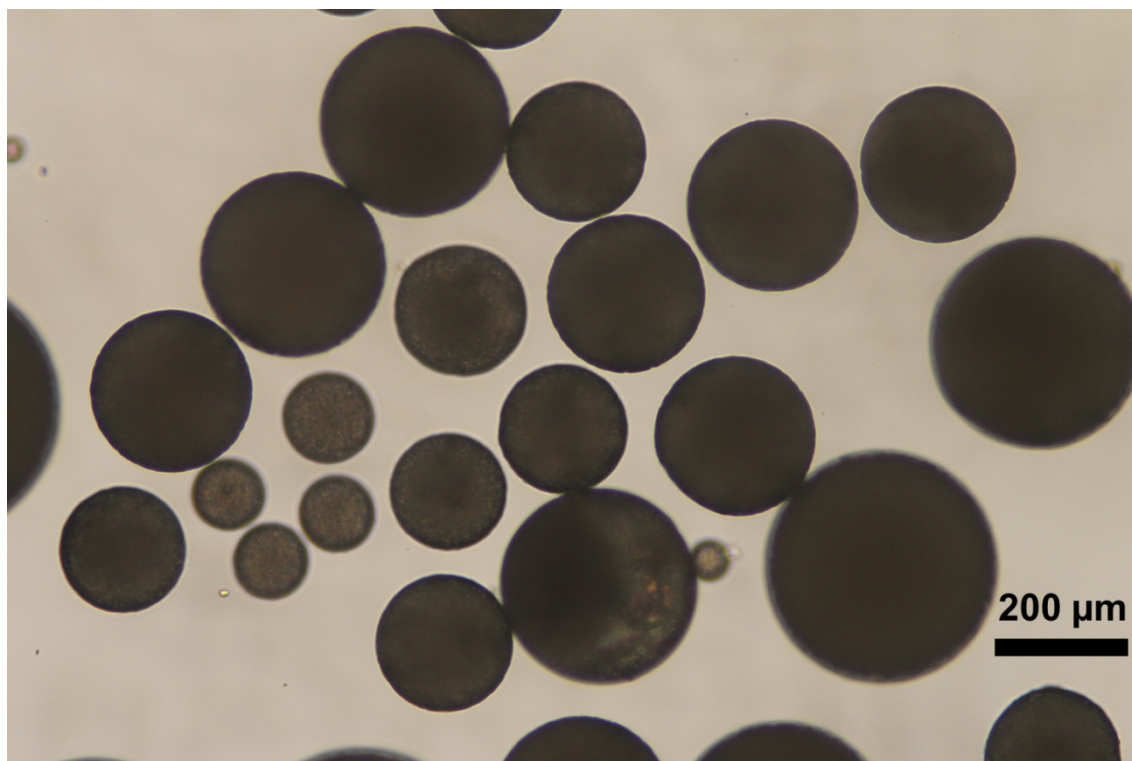

Figure S6. Optical microscopic image of HDI-trimer containing polyurea microcapsules with shell modification using 2-ethylhexylamine in the wet state.



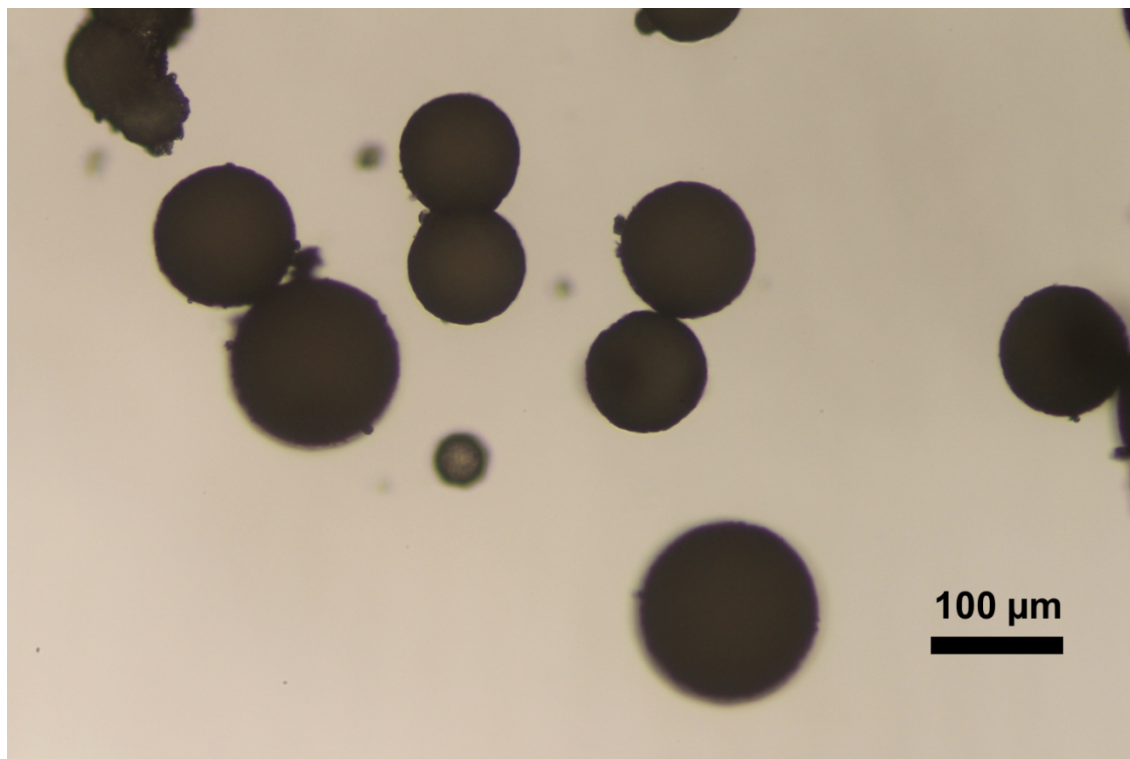

Figure S7. Optical microscopic image of of HDI-trimer containing polyurea microcapsules with shell modification using a 50:50 molar mixture of perfluorodecylamine and 2-ethylhexylamine in the wet state.

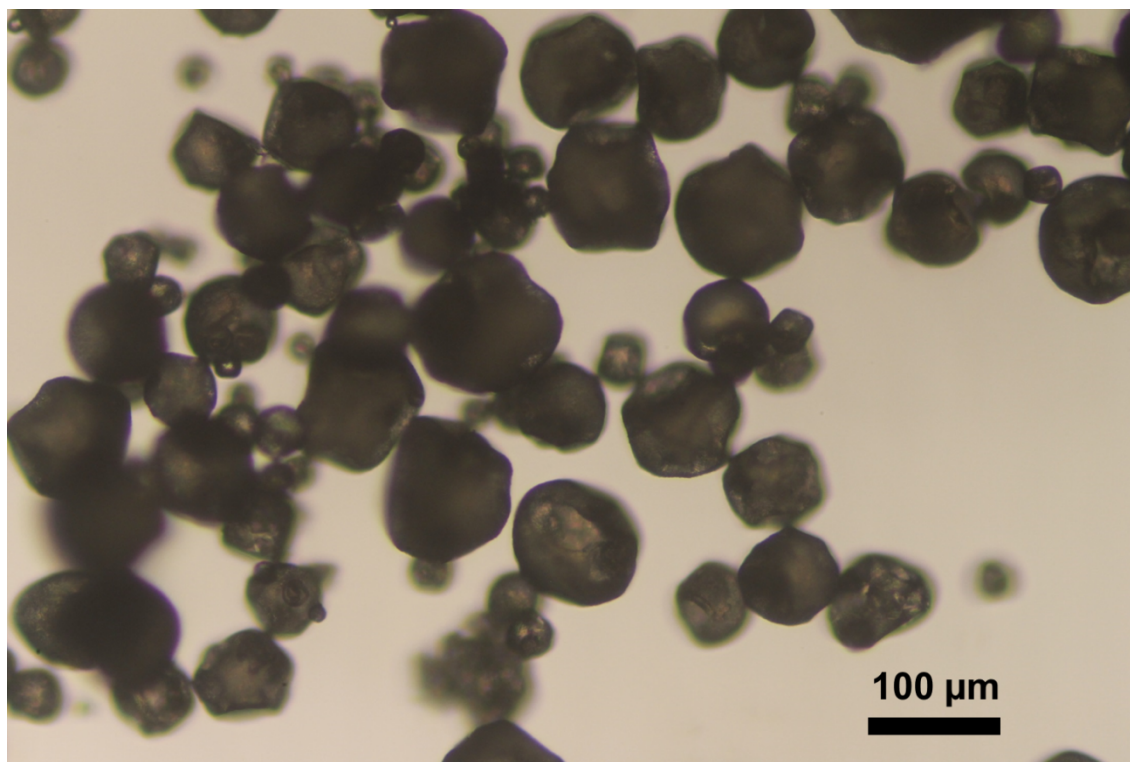

Figure S8. Optical microscopic image of of HDI-trimer containing polyurea microcapsules with shell modification using 3,4-difluorobenzylamine in the wet state.

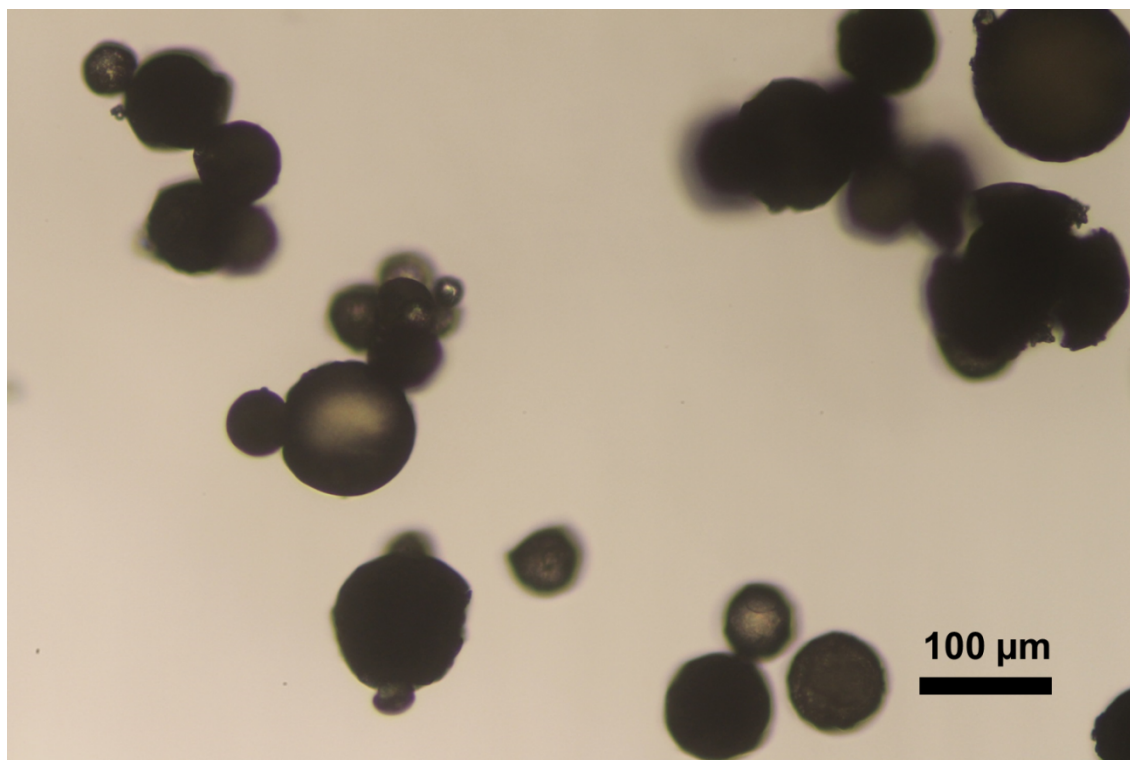

Figure S9. Optical microscopic image of of HDI-trimer containing polyurea microcapsules with shell modification using a 50:50 molar mixture of 3,4-difluorobenzylamine and 2-ethylhexylamine in the wet state.
